# Supplementary material for: Tunable hierarchical Fe nanowires with a facile template-free approach for enhanced microwave absorption performance
Source: Royal Society of Chemistry journal article supplement (doi:10.1039/c6tc01912a), 2016-01-01
Supplement: c6tc01912a1.pdf [file c6tc01912a1.pdf]

Electronic Supplementary Information (ESI) for Journal of Materials Chemistry C

## Tunable hierarchical Fe nanowires with a facile template-free approach for enhanced microwave absorption performance†

Junyao Shen,<sup>a</sup> Yongtao Yao,<sup>a</sup> Yanju Liu<sup>b</sup> and Jinsong Leng<sup>\*a</sup>

<sup>a</sup> Center for Composite Materials and Structures, Harbin Institute of Technology (HIT), Harbin 150080, P. R. China.

\*E-mail: lengjs@hit.edu.cn; Fax: +86-451-86402328; Tel: +86-451-86402328

<sup>b</sup> Department of Astronautical Science and Mechanics, Harbin Institute of Technology (HIT), Harbin 150080, P. R. China

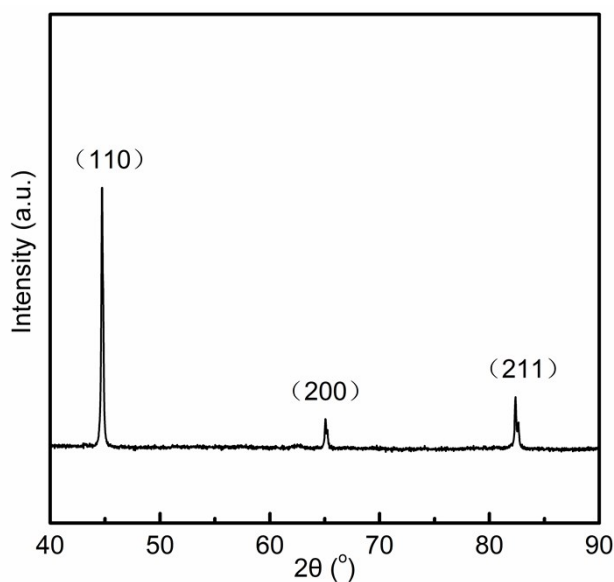

Fig. S1 XRD pattern of commercial Fe nanoparticles.

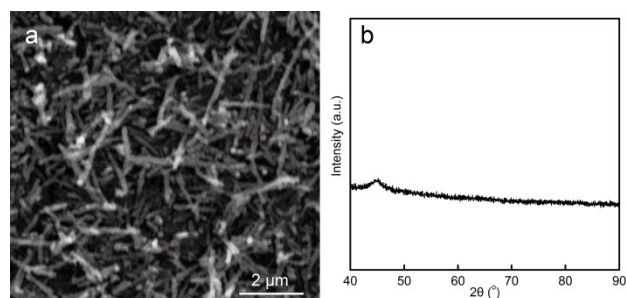

Fig. S2 Initial 2-minute growth of Fe NWs with SEM image (a) and XRD pattern (b)

Table 1 Coercivity ( $H_c$ ) and remnant magnetism( $M_r$ ) of samples

| <b>Samples</b>               | <b>Coercivity (<math>H_c</math>)</b> | <b>remnant magnetism(<math>M_r</math>)</b> |
|------------------------------|--------------------------------------|--------------------------------------------|
| <b>As-synthesized Fe NWs</b> | 360.84 Oe                            | 26.75 emu g <sup>-1</sup>                  |
| <b>As-synthesized Fe NPs</b> | 308.25 Oe                            | 7.73 emu g <sup>-1</sup>                   |
| <b>Commercial Fe NPs</b>     | 235.20 Oe                            | 11.13 emu g <sup>-1</sup>                  |
